# Supplementary material
Source: Springer Nature journal article supplement (https://www.springermedizin.de/resource/supplementary/12889_2012_4982_MOESM2_ESM.pdf/9495692)
Supplement: MOESM2 [file 9495692]

Publications retrieved when running search strategy in:

- PubMed: N = 402
- Web of Knowledge: N = 396
- Sociological Abstracts: N = 166

**N = 792**

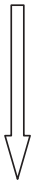

Papers excluded based on abstract  
**N = 767**

Reason of exclusion:

- Focus on adult population : **N = 384** (50 %)
- Not conducted in Western countries: **N = 94** (13 %)
- Does not focus on the research questions of the review (topic not suited) : **N = 289** (37 %)

Papers subjected to more detailed evaluation  
**N = 25**

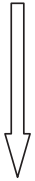

Papers excluded based on full-text  
**N = 19**

Reason of exclusion

- NSC indicator not suited : **N = 3**
- Indicator of NSC not measured at/aggregated to neighborhood level: **N = 4**
- Does not focus on the research questions of the review (topic not suited): **N = 9**
- Studied outcome variable not suited : **N = 1**
- Literature review: **N = 2**

**6 studies**

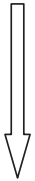

Forward & backward citation tracking  
**N = 2**

**8 studies**

NSC = neighbourhood social capital.

SES = socio-economic status

N= sample size
